# Supplementary material for: Eoscyphella luciurceolata gen. and sp. nov. (Agaricomycetes) Shed Light on Cyphellopsidaceae with a New Lineage of Bioluminescent Fungi
Source: MDPI journal article supplement (doi:10.3390/jof9101004), 2023-10-12
Supplement: s1 [file s1]

## Supplementary materials

Supplementary Table S1: List of specimens; culture, herbarium access number, isolate, strain or voucher collection (V); and GenBank accession numbers.

| Species                               | Clone (Cl), culture (C),<br>herbarium access number (H),<br>isolate (I), strain (S) or voucher<br>collection (V) | LSU rDNA<br>accession n <sup>o</sup> | ITS rDNA<br>accession<br>n <sup>o</sup> |
|---------------------------------------|------------------------------------------------------------------------------------------------------------------|--------------------------------------|-----------------------------------------|
| <i>Acanthocorticium brueggemannii</i> | (V) JMB2122                                                                                                      | KT275195                             | -                                       |
| <i>Acanthocorticium brueggemannii</i> | (V) JMB2621                                                                                                      | KT275196                             | -                                       |
| <i>Akenomyces costatus</i>            | (S) CBS:371.86                                                                                                   | MH873657                             | -                                       |
| <i>Akenomyces costatus</i>            | (S) CBS:513.83                                                                                                   | MH873350                             | MH861635                                |
| <i>Amyloflagellula inflata</i>        | (S) PB305                                                                                                        | AY570990                             | -                                       |
| <i>Armillaria fuscipes</i>            | (S) CMW 4953                                                                                                     | DQ338556                             | -                                       |
| <i>Armillaria gallica</i>             | (I) H1-6                                                                                                         | JF895904                             | -                                       |
| <i>Armillaria mellea</i>              | (V) GLM 45871                                                                                                    | AY207144                             | -                                       |
| <i>Armillaria mellea</i>              | (V) GDA51998                                                                                                     | EU266542                             | -                                       |
| <i>Armillaria ostoyae</i>             | (V) R1374                                                                                                        | AY973747                             | -                                       |
| <i>Armillaria ostoyae</i>             | (V) NA144                                                                                                        | AY973752                             | -                                       |
| <i>Armillaria</i> sp.                 | (S) CM 10115                                                                                                     | FJ875696                             | -                                       |
| <i>Armillaria tabescens</i>           | (S) CMW 3165                                                                                                     | DQ338546                             | -                                       |
| <i>Athelia bombacina</i>              | (S) ATCC 20629                                                                                                   | AF279377                             | -                                       |
| <i>Atheniella rutila</i>              | (V) FFAAS 0354                                                                                                   | NG 153951                            | -                                       |
| <i>Baeospora myosura</i>              | (I) AFTOL-ID 1799                                                                                                | DQ457648                             | -                                       |
| <i>Boletus griseiceps</i>             | (V) HKAS 82692                                                                                                   | NG 058675                            | -                                       |
| <i>Boletus subviolaceofuscus</i>      | (V) HKAS 83149                                                                                                   | NG 058676                            | -                                       |
| <i>Bulbillomyces farinosus</i>        | (V) FO24378                                                                                                      | AJ406578                             | -                                       |
| <i>Calathella columbiana</i>          | (S) PB327                                                                                                        | AY570993                             | AY571028                                |
| <i>Calathella gayana</i>              | (S) ZT8836                                                                                                       | AY572005                             | -                                       |
| <i>Calathella mangrovei</i>           | (S) 1-31-0                                                                                                       | -                                    | AY571029                                |
| <i>Calypotella capula</i>             | (S) CBS:485.86                                                                                                   | AY570994                             | -                                       |
| <i>Calypotella capula</i>             | (S) PB315                                                                                                        | AY570995                             | -                                       |
| <i>Calypotella</i> sp.                | (V) 7110217                                                                                                      | AB512346                             | -                                       |
| <i>Campanophyllum proboscideum</i>    | (V) TENN56402                                                                                                    | AY230866                             | -                                       |
| <i>Campanophyllum proboscideum</i>    | (V) TENN56427                                                                                                    | AY230867                             | -                                       |
| <i>Cheimonophyllum candidissimum</i>  | (I) AFTOL-ID 1765                                                                                                | DQ457654                             | -                                       |
| <i>Chondrostereum purpureum</i>       | (V) C277                                                                                                         | KR264909                             | -                                       |
| <i>Chondrostereum purpureum</i>       | (V) GEL5348                                                                                                      | AJ406563                             | -                                       |
| <i>Chondrostereum purpureum</i>       | (I) CBS 350 53                                                                                                   | MH868775                             | -                                       |
| <i>Chromocyphella lamellata</i>       | (V) AH 45802                                                                                                     | MF623831                             | -                                       |
| <i>Clitocybula oculus</i>             | (S) DAOM195995                                                                                                   | AF261367                             | -                                       |
| <i>Crepidotus subfulviceps</i>        | (I) MCA 3276                                                                                                     | FJ947117                             | -                                       |

|                                         |                        |                 |                 |
|-----------------------------------------|------------------------|-----------------|-----------------|
| <i>Crinipellis stipitaria</i>           | (S) PB302              | AY570997        | -               |
| <i>Cunninghammyces</i> sp.              | (V) He5311             | -               | MW557940        |
| <i>Cunninghammyces</i> sp.              | (V) He5313             | -               | MW557941        |
| <i>Cyphella digitalis</i>               | (I) Thorn-617          | AY293175        | -               |
| <i>Cyphella digitalis</i>               | (I) AFTOL-ID 663       | AY635771        | -               |
| <i>Cyphelloporia bialoviensis</i>       | (V) KRAM F-59691       | ON391555        | -               |
| <i>Cyphelloporia bialoviensis</i>       | (S) G1780              | MK278141        | -               |
| <i>Cyptotrama asprata</i>               | (V) ZRL2015093         | KY418873        | -               |
| <i>Dendrothele acerina</i>              | (S) G0632              | MK277925        | -               |
| <i>Dendrothele alliacea</i>             | (S) G0488              | MK277926        | -               |
| <i>Dendrothele bispora</i>              | (S) CBS:962.96         | -               | OM238172        |
| <i>Dendrothele griseocana</i>           | (C) CBS:340.66         | -               | MH858816        |
| <i>Dendrothele incrustans</i>           | (S) HHB-19092          | -               | MW740330        |
| <i>Dendrothele microspora</i>           | (S) FP.101998          | -               | OQ694474        |
| <i>Dendrothele minutissima</i>          | (S) G1841              | MK277929        | -               |
| <i>Dendrothele nivosa</i>               | (V BHI-F632            | -               | MF161308        |
| <i>Dendrothele nivosa</i>               | (V) iNat62633580       | -               | ON129313        |
| <i>Dendrothele</i> sp.                  | (S) G1907              | MK277935        | -               |
| <i>Dendrothele</i> sp.                  | (S) G1876              | MK277934        | -               |
| <i>Entoloma bloxamii</i>                | (S) TB6117             | AF261289        | -               |
| <i>Entoloma eulividum</i>               | (S) TB6807             | AF261295        | -               |
| <b><i>Eoscyphella luciurceolata</i></b> | <b>(V) FBIPBio94</b>   | <b>OR230674</b> | <b>OR230672</b> |
| <b><i>Eoscyphella luciurceolata</i></b> | <b>(V) FBIPBio96</b>   | <b>OR230673</b> | <b>OR230671</b> |
| <b><i>Eoscyphella</i> sp.</b>           | <b>(V) FPIBio01</b>    | -               | <b>OR260255</b> |
| <i>Filoboletus manipularis</i>          | (I) ACL252             | KJ206957        | -               |
| <i>Filoboletus manipularis</i>          | (I) KUBOT-KRMK-2020-53 | MW444998        | -               |
| <i>Filoboletus pallescens</i>           | (V) BAP 654            | MH385337        | -               |
| <i>Filoboletus pallescens</i>           | (V) DED 8303           | MH385336        | -               |
| <i>Fistulinella ruschii</i>             | (H) FLOR 51611         | NG_060432       | -               |
| <i>Flagelloscypha austrofilicis</i>     | (V) PDD 105591         | KM975368        | KM975436        |
| <i>Flagelloscypha eruciformis</i>       | (V) K(M) 181434        | -               | MZ159475        |
| <i>Flagelloscypha eruciformis</i>       | (V) MH-2018-0187       | -               | MK434305        |
| <i>Flagelloscypha eruciformis</i>       | (V) MH-2018-0190       | -               | MK434306        |
| <i>Flagelloscypha japonica</i>          | (V) NBRC 101830        | AB455964        | LC146734        |
| <i>Flagelloscypha minutissima</i>       | (S) CBS:823.88         | AY571006        | -               |
| <i>Flagelloscypha minutissima</i>       | (C) M01452:264         | -               | LR872900        |
| <i>Flagelloscypha</i> sp.               | (V) Horak 9544         | AY571007        | AY571041        |
| <i>Flagelloscypha</i> sp.               | (V) FLAS-F-70981       | OP932039        | OP932048        |
| <i>Flagelloscypha</i> sp.               | (V) NBRC 104516        | AB455962        | -               |
| <i>Flagelloscypha</i> sp.               | (V) P. del j.          | JX243756        | -               |
| <i>Flammula alnicola</i>                | (I) AFTOL-ID 1501      | DQ457666        | -               |
| <i>Galerina</i> sp.                     | (V) PR6574             | HQ827183        | -               |

|                                  |                           |           |          |
|----------------------------------|---------------------------|-----------|----------|
| <i>Gerronema baishanzuense</i>   | (V) FFAAS0359             | OL985984  | -        |
| <i>Gerronema indigoticum</i>     | (V) HMJAU47636            | MK693732  | -        |
| <i>Gerronema keralense</i>       | (V) CAL 1666              | NG_064531 | -        |
| <i>Gerronema kuruvense</i>       | (V) CAL 1665              | NG_064530 | -        |
| <i>Gerronema nemorale</i>        | (V) FFAAS0379             | OL985998  | -        |
| <i>Gerronema nemorale</i>        | (V) FFAAS0377             | OL985997  | -        |
| <i>Gerronema</i> sp.             | (V) OKM27143              | AF261365  | -        |
| <i>Gerronema strombodes</i>      | (S) JEJ 580               | AF261364  | -        |
| <i>Gerronema subclavatum</i>     | (I) Redhead 5175          | U66434    | -        |
| <i>Gerronema viridilucens</i>    | (V) DED7822               | OR449361  | -        |
| <i>Gerronema wildpretii</i>      | (V) BRNM 788347           | LT854043  | -        |
| <i>Gerronema xanthophyllum</i>   | (V) PRM 924657            | LT854023  | -        |
| <i>Gerronema zhujian</i>         | (V) FFAAS0364             | OL985994  | -        |
| <i>Gerronema zhujian</i>         | (V) FFAAS037              | OL985995  | -        |
| <i>Gloeostereum</i> sp.          | (S) CBS 145006            | MN266884  | -        |
| <i>Granulobasidium vellereum</i> | (I) AFTOL-ID 887          | AY745729  | -        |
| <i>Halocyphina villosa</i>       | (V) NBRC 32086            | AB455965  | -        |
| <i>Halocyphina villosa</i>       | (S) IFO32088              | -         | AY571042 |
| <i>Hebeloma microspora</i>       | (V) E Rebaudengo 5-V-1976 | MF039240  | -        |
| <i>Henningsomyces candidus</i>   | (S) PB338                 | AY571008  | -        |
| <i>Henningsomyces candidus</i>   | (S) R.G.Thorn156          | AF287864  | -        |
| <i>Henningsomyces puber</i>      | (S) GUA-307               | AY571009  | -        |
| <i>Henningsomyces</i> sp.        | (V) FP-105017             | AY571010  | -        |
| <i>Hydropus fuliginarius</i>     | (V) DAOM196062            | AF261368  | -        |
| <i>Hydropus trichoderma</i>      | (S) G0347                 | MK278158  | -        |
| <i>Hymenogloea papyracea</i>     | (S) Halling 5013          | AF261344  | -        |
| <i>Lachnella alboviolascens</i>  | (S) PB332                 | AY571012  | -        |
| <i>Lachnella alboviolascens</i>  | (S) DAOM223321            | AF261475  | -        |
| <i>Lachnella alboviolascens</i>  | (S) MO315410              | -         | MH558281 |
| <i>Lachnella</i> sp.             | (I) ES104                 | -         | MN218811 |
| <i>Lachnella tiliae</i>          | (S) G0887                 | MK277903  | -        |
| <i>Lachnella villosa</i>         | (S) CBS:609.87            | DQ097347  | -        |
| <i>Lachnella villosa</i>         | (S) PB322                 | AY571014  | AY571050 |
| <i>Lachnella villosa</i>         | (S) PB321                 | AY571013  | AY571049 |
| <i>Lachnella villosa</i>         | (V) CCJ 1547              | DQ071724  | -        |
| <i>Macrotyphula fistulosa</i>    | (V) TUB 011469            | DQ071735  | -        |
| <i>Maireina filipendula</i>      | (V) TL14226               | KX772745  | KX772745 |
| <i>Maireina filipendula</i>      | (V) TL2015-724890         | KX772746  | KX772746 |
| <i>Maireina monacha</i>          | (V) ALV30536              | OR197581  | OP099548 |
| <i>Maireina subsphaerosphora</i> | (V) ALV34117              | OR197528  | -        |
| <i>Maireina subsphaerosphora</i> | (V) ALV27634              | OP099548  | OP099549 |
| <i>Marasmius delectans</i>       | (I) DED 89/62             | U11922    | -        |

|                                                      |                         |           |          |
|------------------------------------------------------|-------------------------|-----------|----------|
| <i>Marasmius fulvo ferrugineus</i>                   | (S) HN2346              | AF261584  | -        |
| <i>Merismodes anomala</i> as ' <i>Cyphellopsis</i> ' | (V) TL2015-719433       | KX772747  | KX772748 |
| <i>Merismodes anomala</i> as ' <i>Cyphellopsis</i> ' | (S) PB323               | AY570999  | AY571036 |
| <i>Merismodes anomala</i> as ' <i>Cyphellopsis</i> ' | (S) PB318               | AY570998  | AY571036 |
| <i>Merismodes anomala</i> as ' <i>Cyphellopsis</i> ' | (S) PB333               | AY571000  | -        |
| <i>Merismodes anomala</i> as ' <i>Cyphellopsis</i> ' | (S) CBS:151.79          | AF426955  | AY571034 |
| <i>Merismodes anomala</i> as ' <i>Cyphellopsis</i> ' | (V) GEL4169             | AJ406522  | -        |
| <i>Merismodes fasciculata</i>                        | (S) PB342               | AY571016  | AY571052 |
| <i>Merismodes fasciculata</i>                        | (S) G1064               | MK278379  | -        |
| <i>Merismodes fasciculata</i>                        | (S) HHB-11894           | AY571051  | -        |
| <i>Merismodes fasciculata</i>                        | (V) K(M)194471          | MZ159522  | -        |
| <i>Merismodes fasciculata</i>                        | (I) HHB-11894           | AY571015  | -        |
| <i>Merismodes</i> sp.                                | (V) Alden Dirks ACD0273 | MZ919217  | -        |
| <i>Mycena caeruleomarginata</i>                      | (V) FFAAS 0357          | NG 153993 | -        |
| <i>Mycena cahaya</i>                                 | (I) ACL134              | KJ206950  | -        |
| <i>Mycena</i> cf. <i>Quiniaultensis</i>              | (V) OSC 67121           | EU681183  | -        |
| <i>Mycena chlorophos</i>                             | (I) ACL 259             | JX975221  | -        |
| <i>Mycena chlorophos</i>                             | (I) ACL 055             | JX975220  | -        |
| <i>Mycena crocata</i>                                | (V) GLM 45968           | AY207241  | -        |
| <i>Mycena galericulata</i>                           | (V) GLM 45970           | AY207251  | -        |
| <i>Mycena galopus</i>                                | (V) GLM 45971           | AY207250  | -        |
| <i>Mycena haematopus</i>                             | (V) GLM 45972           | AY207252  | -        |
| <i>Mycena illuminans</i>                             | (I) ACL 175             | JX975218  | -        |
| <i>Mycena illuminans</i>                             | (I) ACL 161             | JX975217  | -        |
| <i>Mycena indigotica</i>                             | (S) WEI16-475           | MH063432  | -        |
| <i>Mycena lucentipes</i>                             | (V) DED7828             | OR343215  | -        |
| <i>Mycena maculata</i>                               | (V) GLM 45974           | AY207254  | -        |
| <i>Mycena noctilucens</i>                            | (I) ACL054              | KJ206947  | -        |
| <i>Mycena olivaceomarginata</i>                      | (V) GLM 45976           | AY207255  | -        |
| <i>Mycena polygramma</i>                             | (V) TUB 011575          | DQ071707  | -        |
| <i>Mycena pura</i>                                   | (I) TM02 201            | EU522743  | -        |
| <i>Mycena sanguinolenta</i>                          | (V) GLM 45982           | AY207257  | -        |
| <i>Mycena seminau</i>                                | (I) ACL136              | KJ206952  | -        |
| <i>Mycena sinar</i>                                  | (I) ACL092              | KJ206948  | -        |
| <i>Mycena</i> sp.                                    | (V) JMCR 32             | AF261362  | -        |
| <i>Mycena</i> sp.                                    | (I) ACL133              | KJ206949  | -        |
| <i>Mycena tintinnabulum</i>                          | (V) GLM 45983           | AY207258  | -        |
| <i>Mycena zephrus</i>                                | (V) GLM 45984           | AY207259  | -        |
| <i>Mycopan scabripes</i>                             | (S) G0261 MK278154      | MK278154  | -        |
| <i>Mycopan scabripes</i>                             | (I) DAOM192847          | AF042635  | -        |
| <i>Neonothopanus gardneri</i>                        | (H) SP:416340           | JF344714  | -        |
| <i>Neonothopanus nambi</i>                           | (I) ACL251              | KJ206956  | -        |

|                                  |                   |           |          |
|----------------------------------|-------------------|-----------|----------|
| <i>Neonothopanus nambi</i>       | (I) ACL155        | KJ206954  | -        |
| <i>Neonothopanus nambi</i>       | (V) HNJAU 48224   | MW250232  | -        |
| <i>Nia</i> sp.                   | (V) MF 1330       | MK491335  |          |
| <i>Nia</i> sp.                   | (S) CBS H-23851   | MK491336  | OQ555325 |
| <i>Nia vibrissa</i>              | (V) NBRC 32090    | AB455968  | -        |
| <i>Nia vibrissa</i>              | (I) FCUL170907CF6 | MG597153  | -        |
| <i>Nia vibrissa</i>              | (V) FCUL070108CF9 | MG597151  | -        |
| <i>Nia vibrissa</i>              | (V) NBRC 32089    | AB455967  | -        |
| <i>Nia vibrissa</i>              | (I) CBS:1198.15   | -         | OQ694464 |
| <i>Nia vibrissa</i>              | (I) REG M200      | -         | AY57105  |
| <i>Omphalotus japonicus</i>      | (I) 456           | AF042008  | -        |
| <i>Omphalotus nidiformis</i>     | (S) CBS:323.49    | MH868064  | -        |
| <i>Omphalotus nidiformis</i>     | (S) G1765         | MK278424  | -        |
| <i>Omphalotus olearius</i>       | (I) CBS:141.34    | AF042010  | -        |
| <i>Omphalotus olivascens</i>     | (S) VT645 7       | AF261325  | -        |
| <i>Panaeolina foenicisii</i>     | (I) J152          | AF041537  | -        |
| <i>Panellus crassiporus</i>      | (V) Dai 23664     | ON074730  | -        |
| <i>Panellus crassiporus</i>      | (V) BJFC 031637   | NG_088354 | -        |
| <i>Panellus luminescens</i>      | (I) ACL205        | KJ206955  | -        |
| <i>Panellus pusillus</i>         | (S) RV PR98 36    | AF261425  | -        |
| <i>Panellus stipticus strain</i> | (S) CBS 389 50    | MH868192  | -        |
| <i>Panellus stypticus</i>        | (S) GLM 51801     | AY398745  | -        |
| <i>Pellidiscus pallidus</i>      | (S) C58178        | AY571017  | -        |
| <i>Pellidiscus</i> sp.           | (Cl) H06M7K43     | HF676376  | -        |
| <i>Peyronelina glomerulata</i>   | (V) NBRC 104517   | AB455955  | -        |
| <i>Peyronelina glomerulata</i>   | (V) NBRC 104522   | AB455961  | -        |
| <i>Peyronelina glomerulata</i>   | (V) NBRC 104521   | AB455959  | -        |
| <i>Peyronelina glomerulata</i>   | (V) NBRC 102381   | AB455958  | -        |
| <i>Phaeosolenia densa</i>        | (S) C61963        | AY571019  | -        |
| <i>Phaeosolenia densa</i>        | (S) C61839        | AY571018  | -        |
| <i>Phyllotopsis nidulans</i>     | (V) TENN F-69019  | KP026224  | -        |
| <i>Phyllotopsis nidulans</i>     | (I) TFB11482      | KP026220  | -        |
| <i>Pleurocybella porrigens</i>   | (I) AFTOL-ID 2001 | EF537894  | -        |
| <i>Pleurocybella porrigens</i>   | (V) TUB 012154    | DQ071737  | -        |
| <i>Pleurotus eryngii</i>         | (I) d9            | AY524788  | -        |
| <i>Pleurotus nebrodensis</i>     | (S) ACCC 51060    | EU365659  | -        |
| <i>Pleurotus nebrodensis</i>     | (I) P151          | MG282550  | -        |
| <i>Pleurotus ostreatus</i>       | (S) CBS 375 51    | EU365665  | -        |
| <i>Pleurotus ostreatus</i>       | (V) TUB 011571    | DQ071722  | -        |
| <i>Pleurotus pulmonarius</i>     | (I) d3            | AY524787  | -        |
| <i>Pleurotus pulmonarius</i>     | (V) BORHF0429     | MH178092  | -        |
| <i>Pouzarella nodospora</i>      | (S) TB5716        | AF261308  | -        |

|                                      |                    |           |          |
|--------------------------------------|--------------------|-----------|----------|
| <i>Pseudolasiobolus minutissimus</i> | (V) G M 2017-11-19 | MN630583  | MN630583 |
| <i>Rectipilus fasciculatus</i>       | (V) GEL4482        | AJ406553  | -        |
| <i>Rectipilus idahoensis</i>         | (S) PB313          | AY571020  | -        |
| <i>Rectipilus natalensis</i>         | (S) PB312          | AY571021  | -        |
| <i>Rectipilus</i> sp.                | (V) G1859          | MK277907  | -        |
| <i>Rectipilus</i> sp.                | (V) G1863          | MK277909  | -        |
| <i>Resupinatus alboniger</i>         | (S) G0079          | MK278439  | -        |
| <i>Resupinatus conspersus</i>        | (V) C61852         | AY571024  | -        |
| <i>Rhodocybe mundula</i>             | (S) TB4698         | AF261284  | -        |
| <i>Roridomyces roridus</i>           | (V) NOFQB24 Q35    | LC757539  | -        |
| <i>Roridomyces roridus</i>           | (V) GLM 45980      | AY207298  | -        |
| <i>Roridomyces roridus</i>           | (S) DAOM215019     | AF261408  | -        |
| <i>Simocybe rhabarbarina</i>         | (V) LUG 19069      | NG 059999 | -        |
| <i>Stigmatolemma urceolatum</i>      | (S) G0373          | MK278578  | -        |
| <i>Stromatoscypha fimbriatum</i>     | (S) HC.10/11/98.C  | AF261370  | -        |
| <i>Stromatoscypha fimbriatum</i>     | (S) FP102067       | AF261371  | -        |
| <i>Trogia infundibuliformis</i>      | (S) KUN HKAS63661  | JQ031780  | -        |
| <i>Trogia infundibuliformis</i>      | (S) KUN HKAS56709  | JQ031781  | -        |
| <i>Trogia venenata</i>               | (S) KUN HKAS54710  | JQ031778  | -        |
| <i>Trogia venenata</i>               | (S) KUN HKAS56679  | JQ031779  | -        |
| <i>Tubaria hiemalis</i>              | (V) MCA385         | AF205689  | -        |
| <i>Tubaria keralensis</i>            | (V) CAL 1311       | KX585250  | -        |
| <i>Tubaria peculiaris</i>            | (V) PDD 98277      | KY827260  | -        |
| <i>Tubaria peculiaris</i>            | (V) PDD 72769      | KY827259  | -        |
| <i>Woldmaria crocea</i>              | (S) G1864 MK278664 | MK278664  | -        |
| <i>Woldmaria crocea</i>              | (S) NH 10.23.95    | AY571026  | -        |
| <i>Xerula strigosa</i>               | (V) Zhu513         | KF530568  | -        |
